# Supplementary material for: pH sensitive chitosan-mesoporous silica nanoparticles for targeted delivery of a ruthenium complex with enhanced anticancer effects
Source: Royal Society of Chemistry journal article supplement (doi:10.1039/c6dt03783f), 2016-01-01
Supplement: c6dt03783f1.pdf [file c6dt03783f1.pdf]

## **Supplementary Information**

### **pH Sensitive Chitosan-Mesoporous Silica Nanoparticles for Targeted Delivery of Ruthenium Complex with Enhanced Anticancer Effects**

**Gaochao Lv, Ling Qiu\*, Guiqing Liu, Wei Wang, Ke Li, Xueyu Zhao and  
Jianguo Lin\***

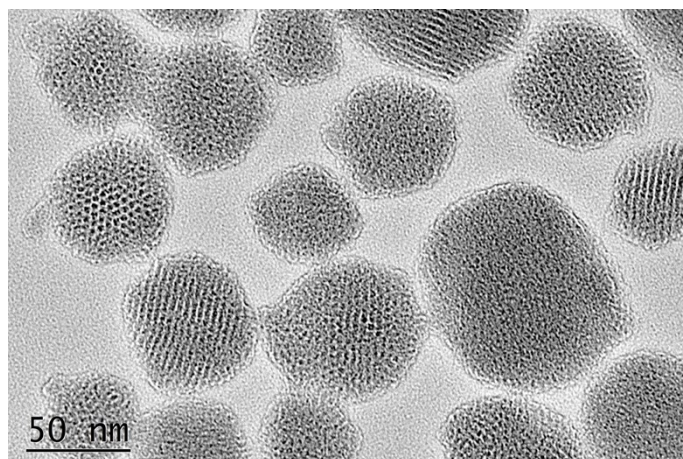

(a)

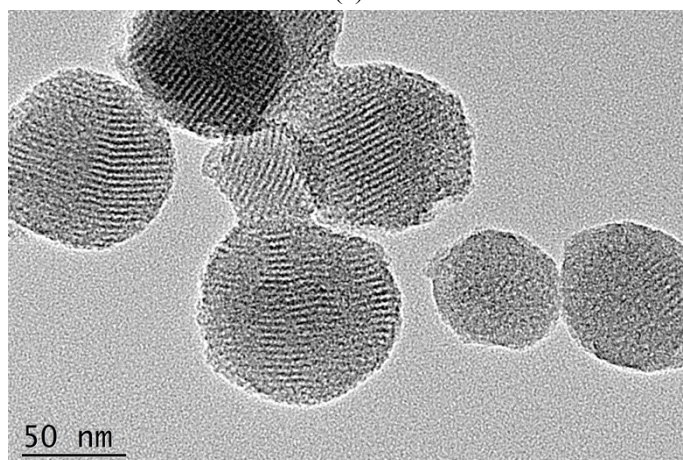

(b)

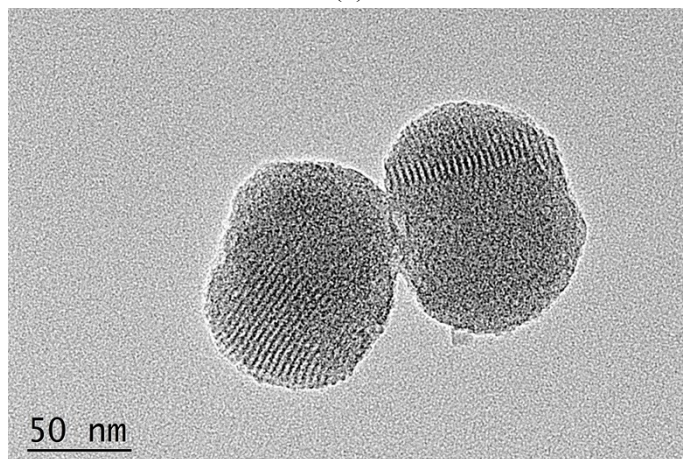

(c)

**Fig. S1** The TEM images of MSNs, RuNHC@MSNs-Biotin and RuNHC@MSNs-CTS-Biotin nanoparticles. Scale bars are 50 nm.

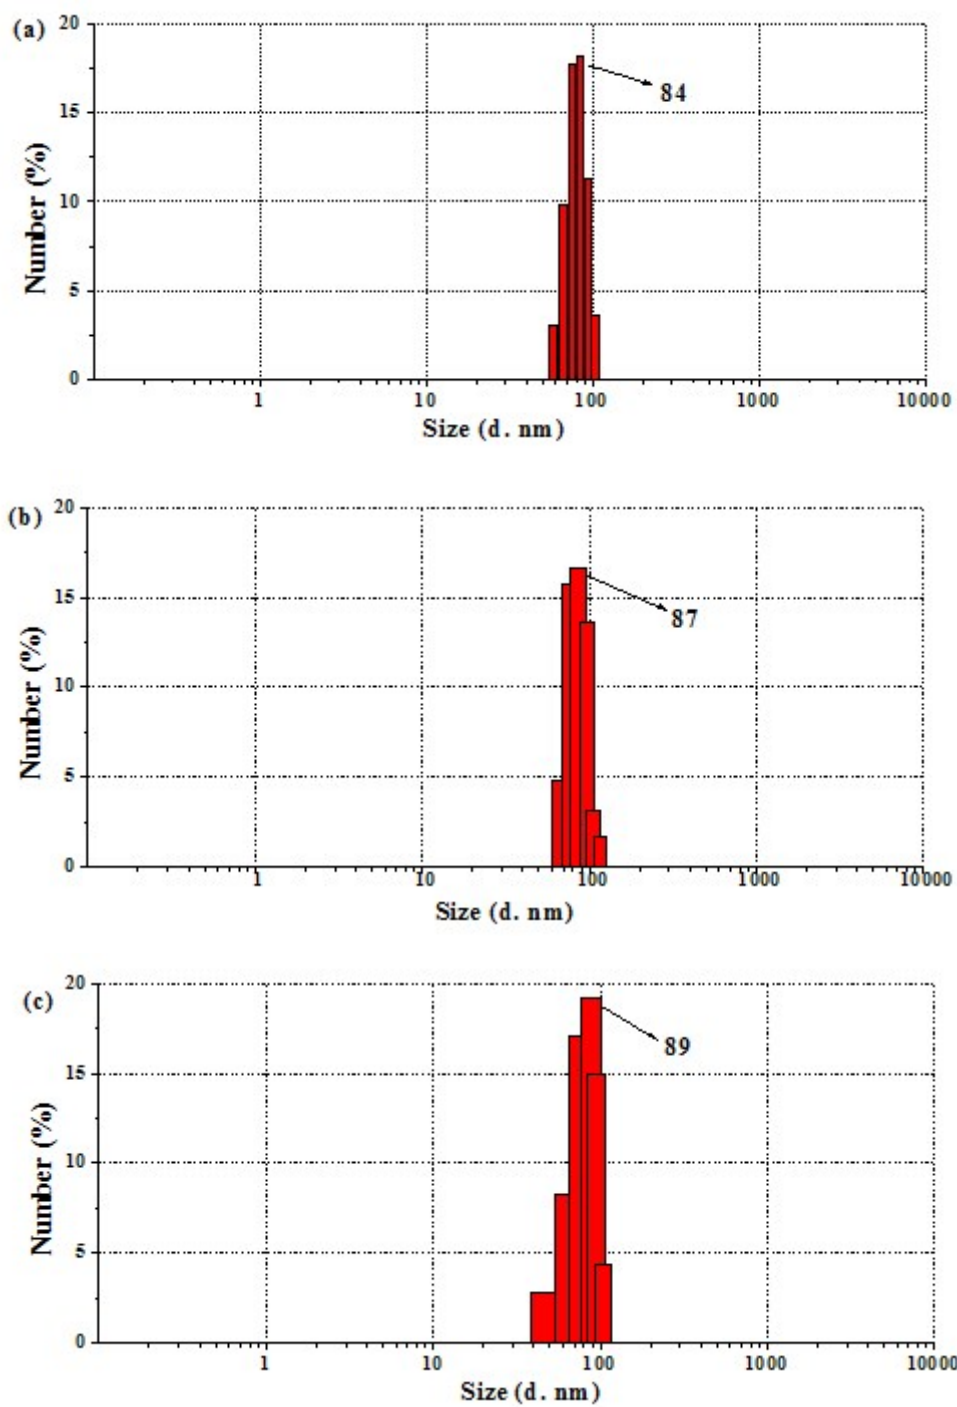

**Fig. S2** Size distribution and mean size of MSNs (a), RuNHC@MSNs-Biotin (b) and RuNHC@MSNs-CTS-Biotin (c) nanoparticles.

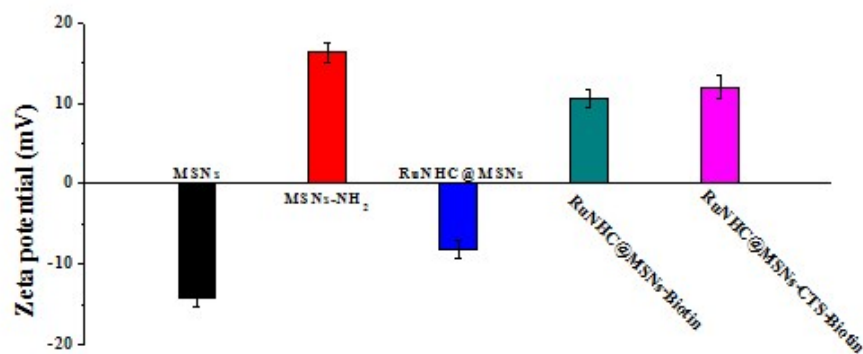

**Fig. S3** Zeta potential of MSNs, MSNs-NH<sub>2</sub>, RuNHC@MSNs, RuNHC@MSNs-Biotin and RuNHC@MSNs-CTS-Biotin nanoparticles.

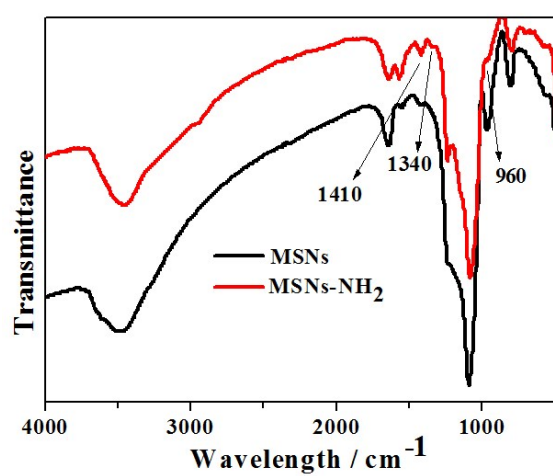

**Fig. S4** FT-IR spectra of MSNs and MSNs-NH<sub>2</sub>.

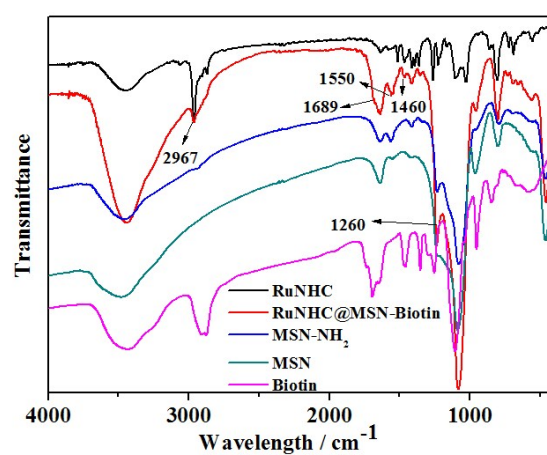

**Fig. S5** IR spectra of RuNHC@MSNs-Biotin.

## Labeling of FITC

The label of FITC to nanoparticles was tested by UV-vis spectroscopy. As shown in Fig. S7, the absorbance at 495 nm of RuNHC@MSNs-Biotin and RuNHC@MSNs-CTS-Biotin indicated the successful labelling of FITC. And the absorption at 220 nm in UV-vis spectrum of RuNHC@MSNs-Biotin and RuNHC@MSNs-CTS-Biotin proved the successful loading of RuNHC complex. The content of FITC in nanoparticles was also calculated by UV-vis spectroscopy. And the results showed that 34.94  $\mu\text{g}/\text{mg}$  and 83.52  $\mu\text{g}/\text{mg}$  of FITC for RuNHC@MSNs-CTS-Biotin and RuNHC@MSNs-Biotin, respectively.

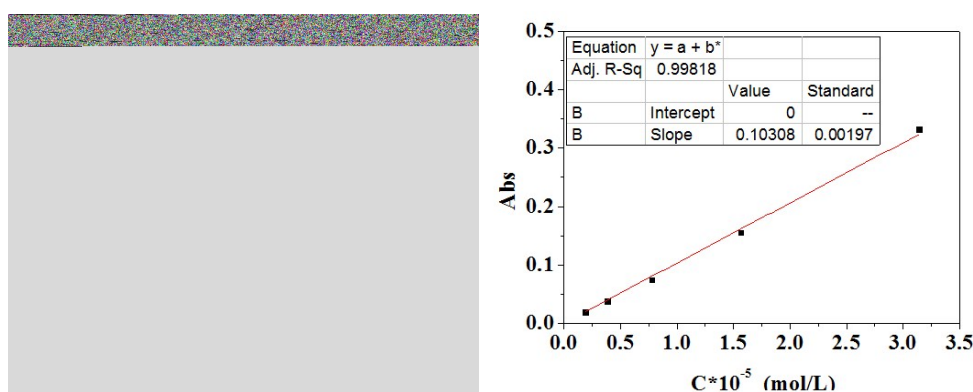

**Fig. S6** The UV-vis spectra of FITC labeled nano-drugs (left) and the standard line of FITC at 495 nm in PBS 7.4 solution (right).

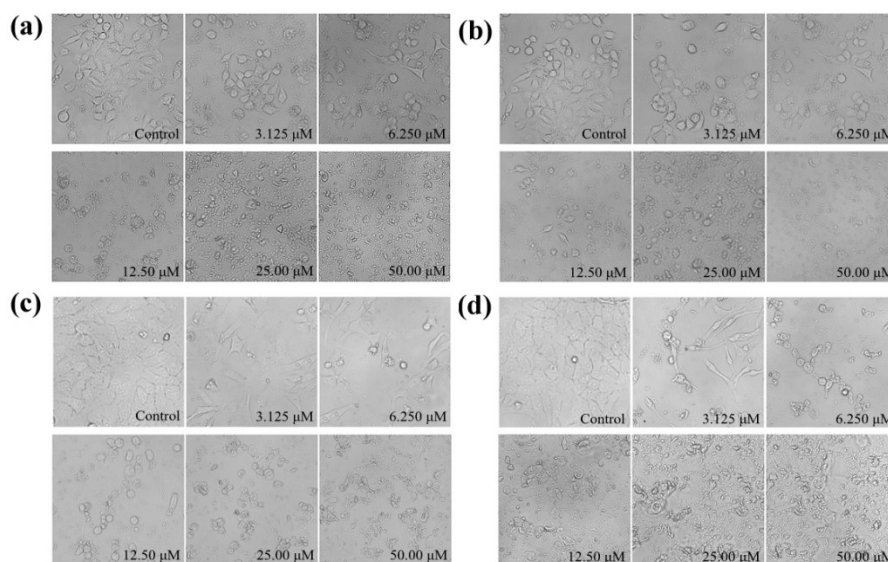

**Fig. S7** The cellular morphology before and after treated with different concentration of nano-drugs for 48 h. The cells were photographed using an inverted microscope (magnification 200 $\times$ ).

(a) A549+RuNHC@MSNs-Biotin; (b) A549+RuNHC@MSNs-CTS-Biotin; (c) HeLa+RuNHC@MSNs-Biotin; (d) HeLa+RuNHC@MSNs-CTS-Biotin.

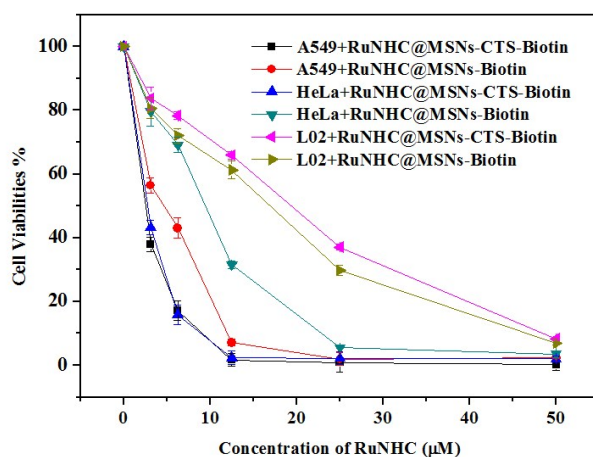

**Fig. S8** The cell viabilities at various RuNHC concentrations treated for 48 h.

**Table S1** The surface area, pore volume and pore size of MSNs, RuNHC@MSNs-Biotin and RuNHC@MSNs-CTS-Biotin.

| Samples               | Surface area        | Pore Volume          | Pore Size |
|-----------------------|---------------------|----------------------|-----------|
|                       | (m <sup>2</sup> /g) | (cm <sup>3</sup> /g) | (nm)      |
| MSNs                  | 883.811             | 0.778                | 2.59      |
| RuNHC@MSNs-Biotin     | 302.098             | 0.2328               | 2.35      |
| RuNHC@MSNs-CTS-Biotin | 50.334              | 0.1223               | 1.99      |

**Table S2** IC<sub>50</sub> values of RuNHC and nano-drugs.

| Compounds               | IC <sub>50</sub> (μM) <sup>a</sup> |           |            |
|-------------------------|------------------------------------|-----------|------------|
|                         | A549                               | HeLa      | L02        |
| RuNHC                   | 6.88±0.49                          | 9.72±1.21 | 7.60±0.53  |
| RuNHC@MSNs-Biotin       | 3.70±0.27                          | 6.41±0.97 | 17.06±1.20 |
| RuNHC@MSNs-CTS-Biotin   | 2.08±0.19                          | 1.88±0.19 | 19.35±0.96 |
| MSNs-Biotin (μg/mL)     | >100                               | >100      | >100       |
| MSNs-CTS-Biotin (μg/mL) | >100                               | >100      | >100       |

<sup>a</sup>Inhibitory activity was assayed by exposure for 48 h to substances and expressed as concentration required to inhibit tumor cell proliferation by 50% (IC<sub>50</sub>). Data are presented as the means ± SDs of three independent experiments.
